# Supplementary material for: Glass hybrid restorations as an alternative for restoring hypomineralized molars in the ART model
Source: PubMed Central journal article supplement (PMC5907471; doi:10.1186/s12903-018-0528-0), 2018-04-18
Supplement: 12903_2018_528_MOESM1_ESM.pdf [file 12903_2018_528_MOESM1_ESM.pdf]

**PARENT/GUARDIAN SOCIAL QUESTIONNAIRE**

Name of the respondent: \_\_\_\_\_

Father ( ) Mother ( ) Other ( )

Telephone: \_\_\_\_\_

Child's name/ID: \_\_\_\_\_

**Information about the parent who is replying this questionnaire**

1. Do you have a job??  Yes  No

Profession: \_\_\_\_\_.

2. Residence: house  apartment   
 Own house  rented  other: \_\_\_\_\_

3. How many people live with you? \_\_\_\_\_.

4. How many people have a job? \_\_\_\_\_.

5. Monthly family income:

at least 1 brazilian minimum wages (BMW)  more than de 1 until 2 BMW  
 more than de 2 until 5 BMW  more than 5 until 8 BMW  
 more than 8 BMW

6. Did you attend any school?  Yes  No

elementary school  secondary school  
 high school  college education

7. Did you know that your child had dental caries?  Yes  No

8. If yes, did you know it was permanent tooth?  Yes  No

9. If yes, did you seek for any dental treatment to solve the problem?

Yes  No

10. If yes, was it private clinic or a public oral health center?  
\_\_\_\_\_

11. If in a public oral health center, were you able to make an appointment?

Yes  No
